# Supplementary material for: High performance printed organic electrochromic devices based on an optimized UV curable solid-state electrolyte
Source: Royal Society of Chemistry journal article supplement (doi:10.1039/d2nr03209k), 2022-01-01
Supplement: d2nr03209k1.pdf [file d2nr03209k1.pdf]

## **High performance printed organic electrochromic devices based on an optimized UV curable solid-state electrolyte**

Chenchao Huang<sup>a</sup>, Zishou Hu<sup>a,b</sup>, Yuan-Qiu-Qiang Yi<sup>a</sup>, Xiaolian Chen<sup>a</sup>, Xinzhou Wu<sup>\*a</sup>, Wenming Su<sup>\*a,b</sup> and Zheng Cui<sup>a</sup>

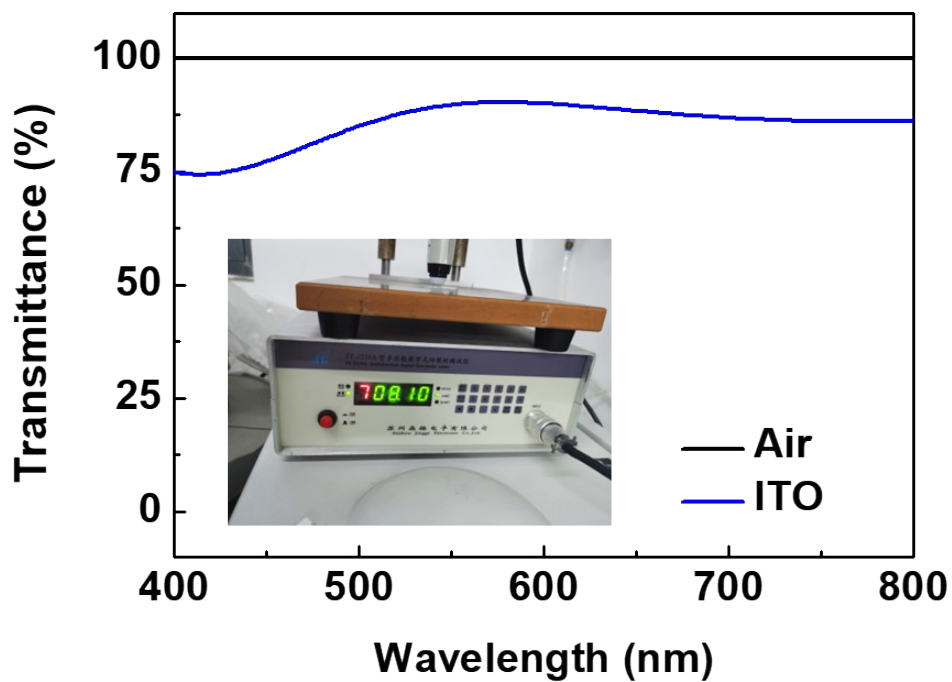

Figure S1 a) Transmittance spectra of ITO substrate, inset is the four-probe test results of the ITO substrate.

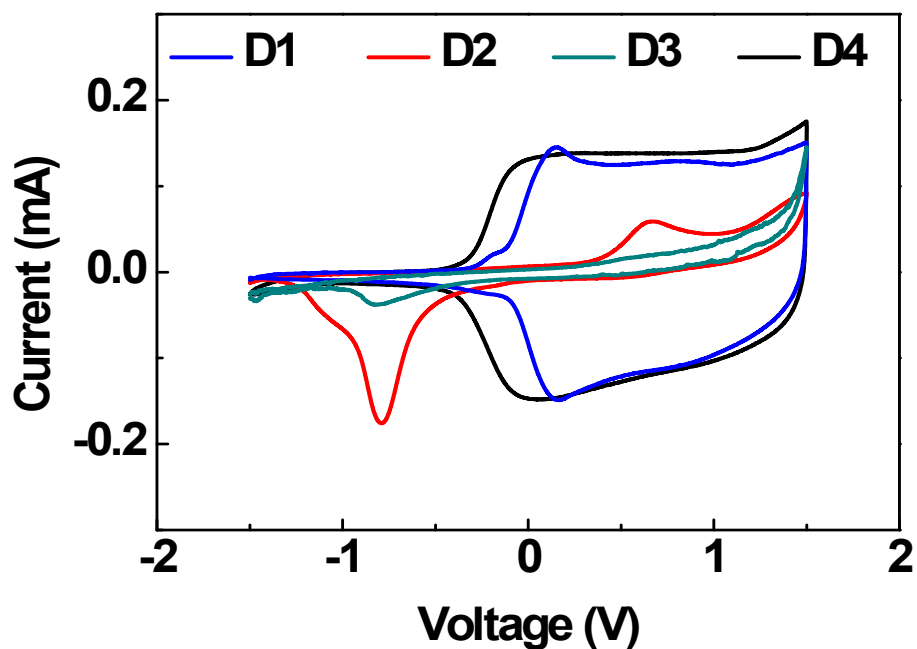

Figure S2 Cyclic voltammograms of D1-D4 with a scan rate of  $50 \text{ mV s}^{-1}$ .

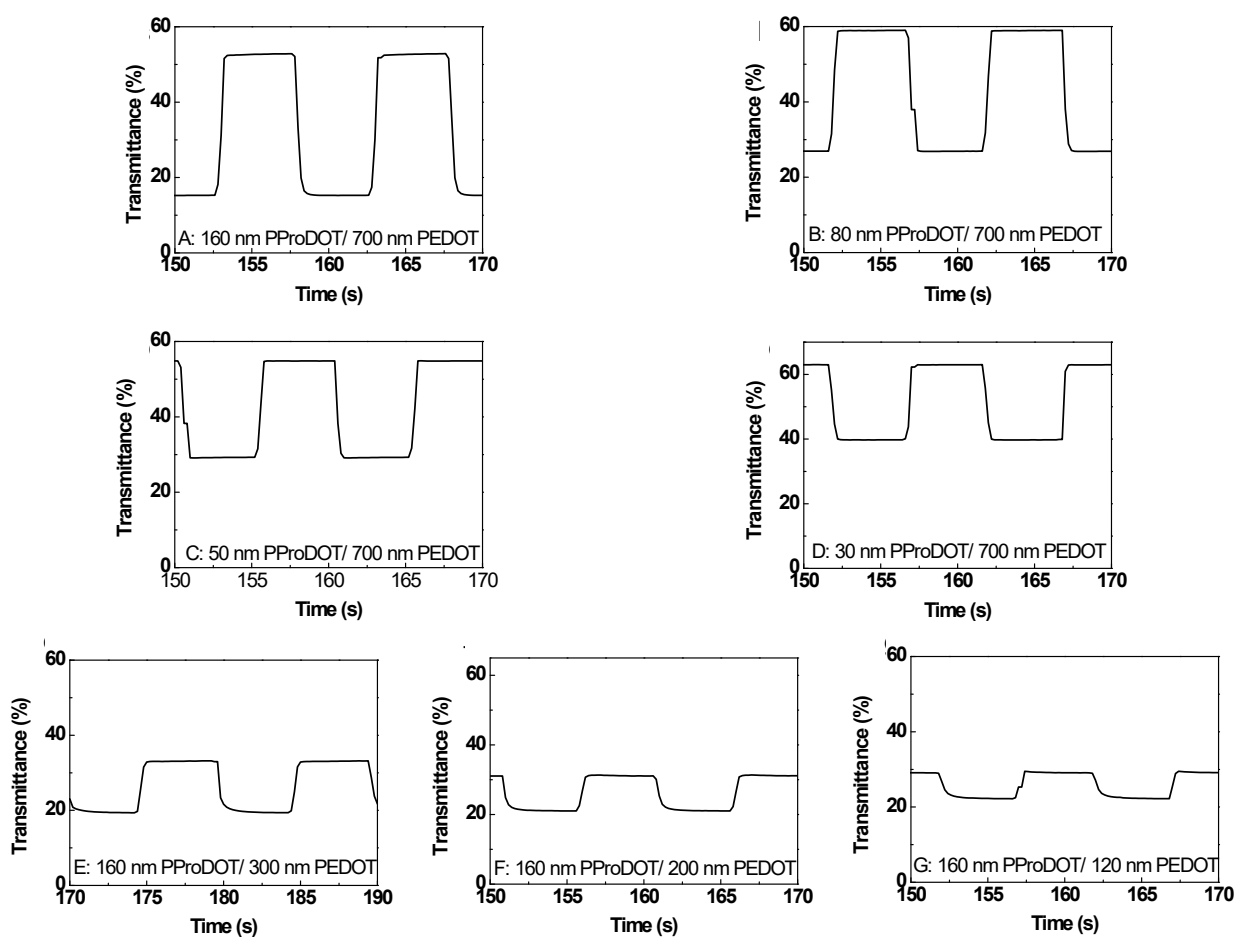

**Figure S3** (A)-(G) Transmittance change ( $\Delta T$ , %) at 550 nm of A-G, respectively.

Device A: ITO/ PProDOT ~160 nm/ Electrolyte 2/ PEDOT ~700 nm/ ITO;

Device B: ITO/ PProDOT ~80 nm/ Electrolyte 2/ PEDOT ~700 nm/ ITO;

Device C: ITO/ PProDOT ~50 nm/ Electrolyte 2/ PEDOT ~700 nm/ ITO;

Device D: ITO/ PProDOT ~30 nm/ Electrolyte 2/ PEDOT ~700 nm/ ITO;

Device E: ITO/ PProDOT ~160 nm/ Electrolyte 2/ PEDOT ~300 nm/ ITO;

Device F: ITO/ PProDOT ~160 nm/ Electrolyte 2/ PEDOT ~200 nm/ ITO;

Device G: ITO/ PProDOT ~160 nm/ Electrolyte 2/ PEDOT ~120 nm/ ITO.

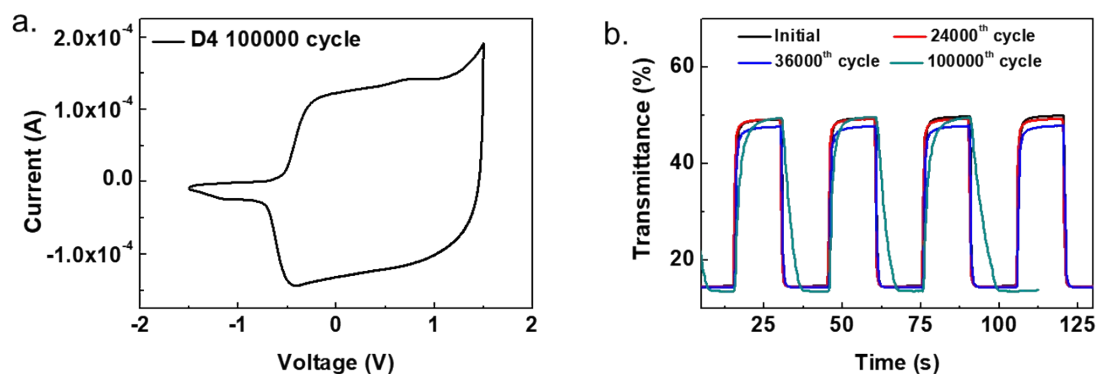

**Figure S4** a. CV curve of D4 after 100000 cycles at a scan rate of  $50 \text{ mV s}^{-1}$  in the potential range of  $-1.5$  to  $1.5 \text{ V}$ ; b. The change in the transmittance with time upon potential switching between  $0.6 \text{ V}$  and  $-0.5 \text{ V}$  of D4.

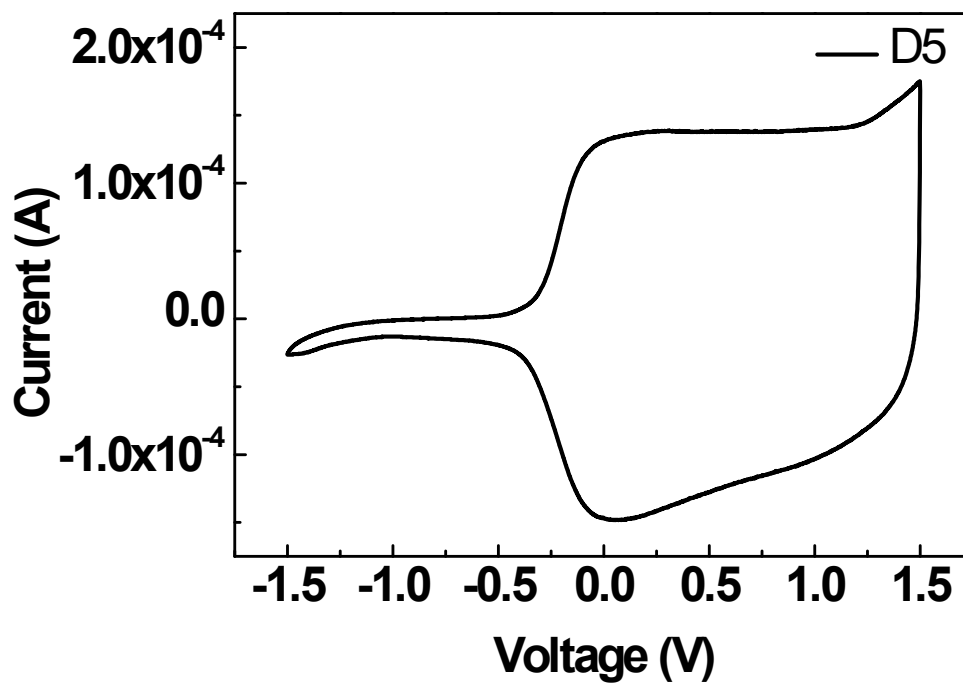

**Figure S5** CV curve of D5 at a scan rate of  $50 \text{ mV s}^{-1}$  in the potential range of  $-1.5$  to  $1.5 \text{ V}$ .

**Table S1** Performance summary of A-G

| Device | Thickness       |                 | Bleaching (V) | Coloration (V) | $\Delta T^c$ (at 550 nm) | Response Time (s) |           |
|--------|-----------------|-----------------|---------------|----------------|--------------------------|-------------------|-----------|
|        | EC <sup>a</sup> | CE <sup>b</sup> |               |                |                          | Bleaching         | Colouring |
| A      | ~160 nm         | ~700 nm         | 0.6           | -0.5           | 37.2                     | 0.6               | 0.6       |
| B      | ~80 nm          | ~700 nm         | 0.6           | -0.5           | 32.1                     | 0.6               | 0.6       |
| C      | ~50 nm          | ~700 nm         | 0.6           | -0.5           | 25.8                     | 0.6               | 0.4       |
| D      | ~30nm           | ~700 nm         | 0.6           | -0.5           | 23.3                     | 0.6               | 0.5       |
| E      | ~160 nm         | ~300 nm         | 0.6           | -0.5           | 13.7                     | 0.4               | 0.4       |
| F      | ~160 nm         | ~200 nm         | 0.6           | -0.5           | 10.2                     | 0.7               | 0.6       |
| G      | ~160 nm         | ~120 nm         | 0.6           | -0.5           | 7.0                      | 0.7               | 0.4       |

<sup>a</sup>electrochromic layer, <sup>b</sup>counter electrode, <sup>c</sup>The optical contrast,  $\Delta T$ , is the transmittance loss of the device between bleached and colored state.
